# Supplementary material for: Photoinduced electron transfer from quantum dots to TiO2: elucidating the involvement of excitonic and surface states
Source: Royal Society of Chemistry journal article supplement (doi:10.1039/c6cp03813a), 2016-01-01
Supplement: c6cp03813a1.pdf [file c6cp03813a1.pdf]

## Electronic Supplementary Information

### Photoinduced Electron Transfer from Quantum Dots to TiO<sub>2</sub>: Elucidating the Involvement of Excitonic and Surface States

Saurabh Chauhan and David F. Watson

*Department of Chemistry, University at Buffalo, The State University of New York; Buffalo, New York 14260-3000. Email: dwatson3@buffalo.edu.*

**Appendix S1.** Detailed description of the preparation of samples for emission spectroscopy.

**Appendix S2.** Derivations of equations 3 and 4 for calculating rate constants of ET ( $k_{et}$ ) and efficiencies of ET ( $\eta_{et}$ ).

**Figure S1.** Square of absorbance (normalized) as a function of energy for core-only CdSe QDs and core/shell CdSe/ZnS QDs, and linear fits to low-energy tails.

**Figure S2.** Normalized emission intensity as a function of equilibration time for dispersions containing core-only CdSe QDs measured at the band-edge maximum of 515 nm (a) and the surface maximum of 750 nm (b) and for dispersions containing core/shell CdSe/ZnS QDs measured at the band-edge maximum of 540 nm (c).

**Figure S3.** TRPL decay traces, instrument response function, multiexponential reconvolution fits, and corresponding residuals from representative measurements for each type of QD-containing dispersion at various wavelengths.

**Table S3.** Values of  $A_i$  and  $\tau_i$  from fits to representative emission decay traces within the band-edge and surface emission bands for dispersions containing core-only CdSe QDs.

**Table S4.** Values of  $\langle \tau \rangle$  within the band-edge emission band and corresponding values of  $k_{et}$  and  $\eta_{et}$  for dispersions containing core-only CdSe QDs.

**Table S5.** Values of  $\langle \tau \rangle$  within the surface emission band and corresponding values of  $k_{et}$  and  $\eta_{et}$  for dispersions containing core-only CdSe QDs.

**Table S6.** Values of  $\langle \tau \rangle$  within the band-edge emission band and corresponding values of  $k_{et}$  and  $\eta_{et}$  for dispersions containing core/shell CdSe/ZnS QDs.

**Table S7.** Values of  $A_i$  and  $\tau_i$  from fits to representative emission decay traces within the band-edge emission band for dispersions containing core/shell CdSe/ZnS QDs.

## Appendix S1. Preparation of Samples

The concentration of core-only CdSe QDs was equal in all mixed dispersions. The absorbance of the stock dispersion of CdSe QDs in 1:1 toluene/ethanol (by volume) at the first excitonic absorption maximum (500 nm) was approximately 0.15. Concentrations of the stock solution of MPA and the stock dispersions of metal oxides (in formula units) in 1:1 toluene/ethanol (by volume) were 1.5 mM and 33 mM, respectively. The mixed dispersions were prepared as follows:

**Table S1.** Compositions of mixed dispersions containing core-only CdSe QDs for spectroscopic analysis.

| Sample<br>(core-only CdSe<br>QDs) | Volume of<br>stock QD<br>dispersion (mL) | Volume of<br>stock MPA<br>solution (mL) | Volume of<br>stock MO <sub>2</sub><br>dispersion<br>(mL) | Volume of<br>solvent (1:1<br>toluene/EtOH)<br>(mL) | Total volume<br>(mL) |
|-----------------------------------|------------------------------------------|-----------------------------------------|----------------------------------------------------------|----------------------------------------------------|----------------------|
| QD alone                          | 10                                       | 0                                       | 0                                                        | 5                                                  | 15                   |
| QD/ZrO <sub>2</sub>               | 10                                       | 0                                       | 3                                                        | 2                                                  | 15                   |
| QD/TiO <sub>2</sub>               | 10                                       | 0                                       | 3                                                        | 2                                                  | 15                   |
| QD/MPA                            | 10                                       | 1                                       | 0                                                        | 4                                                  | 15                   |
| QD-MPA-ZrO <sub>2</sub>           | 10                                       | 1                                       | 3                                                        | 1                                                  | 15                   |
| QD-MPA-TiO <sub>2</sub>           | 10                                       | 1                                       | 3                                                        | 1                                                  | 15                   |

For mixed dispersions containing core/shell CdSe/ZnS QDs, the absorbance of the stock dispersion of QDs at the first excitonic maximum (500 nm) was approximately 0.05. Concentrations of the stock solution of MPA and the stock dispersions of metal oxides (in formula units) in 1:1 toluene/ethanol (by volume) were 1.5 mM and 33 mM, respectively. The mixed dispersions were prepared as follows:

**Table S2.** Compositions of mixed dispersions containing core/shell CdSe/ZnS QDs for spectroscopic analysis.

| Sample<br>(core/shell<br>CdSe/ZnS QDs) | Volume of<br>stock QD<br>dispersion (mL) | Volume of<br>stock MPA<br>solution (mL) | Volume of<br>stock MO <sub>2</sub><br>dispersion<br>(mL) | Volume of<br>solvent (1:1<br>toluene/EtOH)<br>(mL) | Total volume<br>(mL) |
|----------------------------------------|------------------------------------------|-----------------------------------------|----------------------------------------------------------|----------------------------------------------------|----------------------|
| QD alone                               | 20                                       | 0                                       | 0                                                        | 10                                                 | 30                   |
| QD/ZrO <sub>2</sub>                    | 20                                       | 0                                       | 6                                                        | 4                                                  | 30                   |
| QD/TiO <sub>2</sub>                    | 20                                       | 0                                       | 6                                                        | 4                                                  | 30                   |
| QD/MPA                                 | 20                                       | 4                                       | 0                                                        | 6                                                  | 30                   |
| QD-MPA-ZrO <sub>2</sub>                | 20                                       | 4                                       | 6                                                        | 0                                                  | 30                   |
| QD-MPA-TiO <sub>2</sub>                | 20                                       | 4                                       | 6                                                        | 0                                                  | 30                   |

## Appendix S2. Derivation of Equations 3 and 4 for Calculating Rate Constants of ET ( $k_{ET}$ ) and Efficiencies of ET ( $\eta_{et}$ )

Excited states of core-only CdSe QDs or core/shell CdSe/ZnS QDs within QD-MPA-ZrO<sub>2</sub> assemblies can decay radiatively or non-radiatively, as ET is not feasible. If the decay is mono-exponential then

$$\langle \tau \rangle_{QD-MPA-ZrO_2} = \frac{1}{k_r + k_{nr}} \quad (S1)$$

where  $k_r$  and  $k_{nr}$  are rate constants of radiative and non-radiative relaxation, respectively. For QD-MPA-TiO<sub>2</sub> assemblies, in addition to the radiative and non-radiative deactivation pathways, ET is also feasible due to favorable interfacial band energetics. Therefore,

$$\langle \tau \rangle_{QD-MPA-TiO_2} = \frac{1}{k_r + k_{nr} + k_{et}} \quad (S2)$$

An expression for  $k_{et}$  is derived by inverting equations 1 and 2 and taking the difference:

$$k_{et} = \left( \frac{1}{\langle \tau \rangle_{QD-MPA-TiO_2}} - \frac{1}{\langle \tau \rangle_{QD-MPA-ZrO_2}} \right) \quad (3)$$

The efficiency of electron transfer equals number of electrons transferred to TiO<sub>2</sub> ( $N_{et}$ ) divided by the total number of initial photoexcited QDs ( $N_{total}$ ):

$$\eta_{et} = \frac{N_{et}}{N_{total}} \times 100 \quad (S4)$$

The ratio of  $N_{et}$  to  $N_{total}$  equals the ratio of  $k_{et}$  to the sum of all rate constants of excited-state deactivation ( $k_{total}$ ):

$$\frac{N_{et}}{N_{total}} = \frac{k_{et}}{k_{total}} = \frac{k_{et}}{k_r + k_{nr} + k_{et}} \quad (S5)$$

Using equations S2, 3, and S5, equation S4 can be rewritten as

$$\eta_{et} = \left( \frac{1}{\langle \tau \rangle_{QD-MPA-TiO_2}} - \frac{1}{\langle \tau \rangle_{QD-MPA-ZrO_2}} \right) \times \langle \tau \rangle_{QD-MPA-TiO_2} \times 100 \quad (S6)$$

Rearranging equation S6 yields

$$\eta_{inj} = \left( 1 - \frac{\langle \tau \rangle_{QD-MPA-TiO_2}}{\langle \tau \rangle_{QD-MPA-ZrO_2}} \right) \times 100 \quad (4)$$

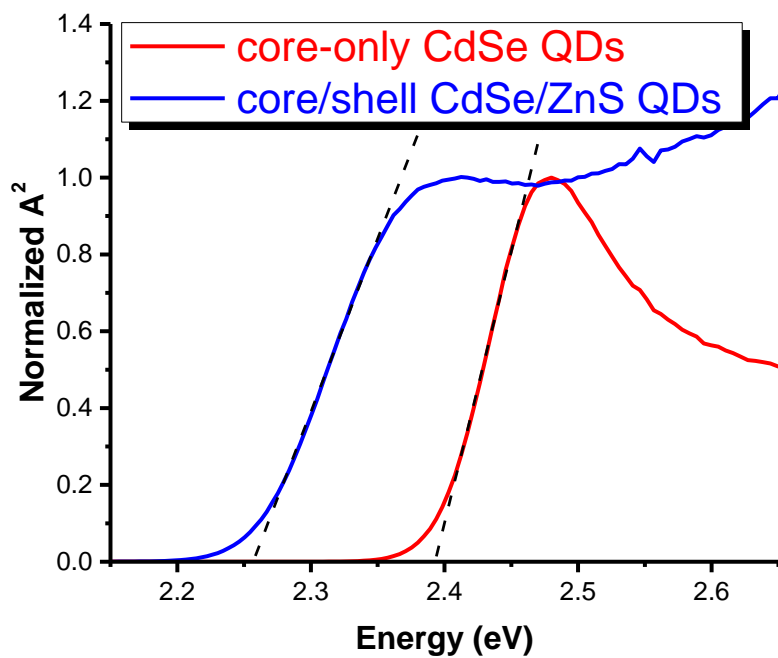

**Fig. S1.** Square of absorbance (normalized) as a function of energy for core-only CdSe QDs and core/shell CdSe/ZnS QDs. Superimposed on the data (dashed black lines) are linear fits to low-energy tails of first excitonic bands.

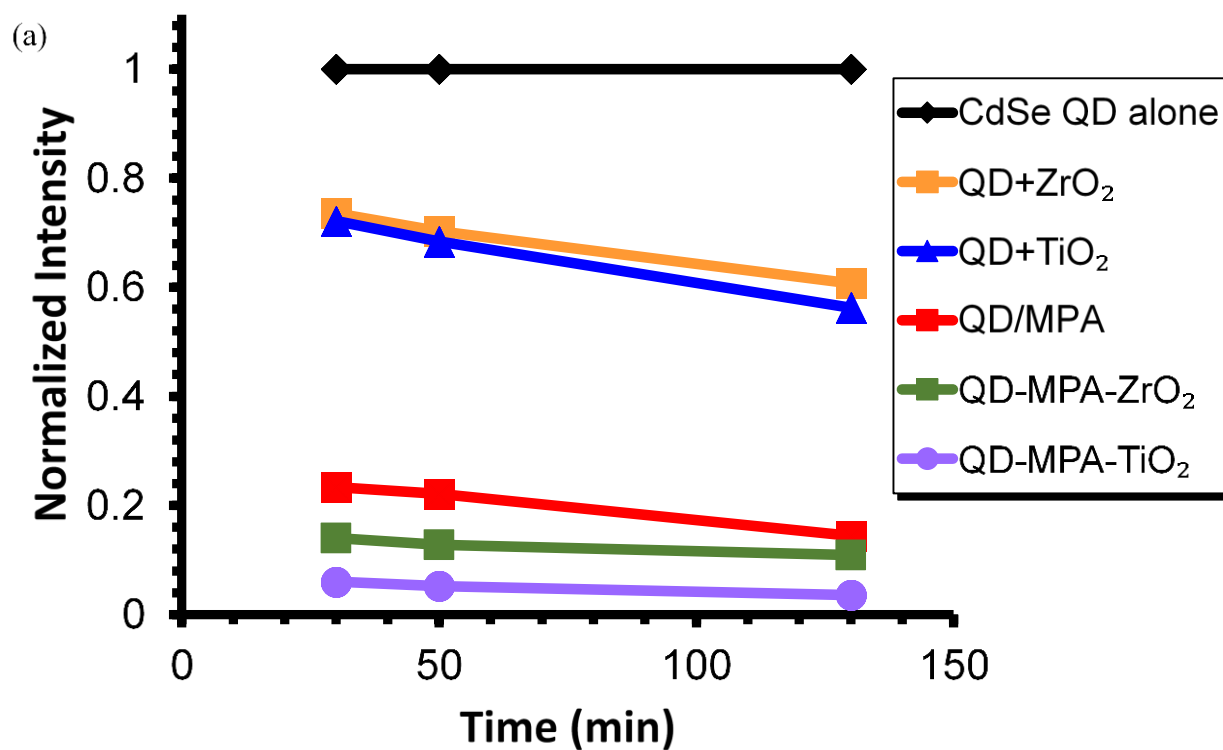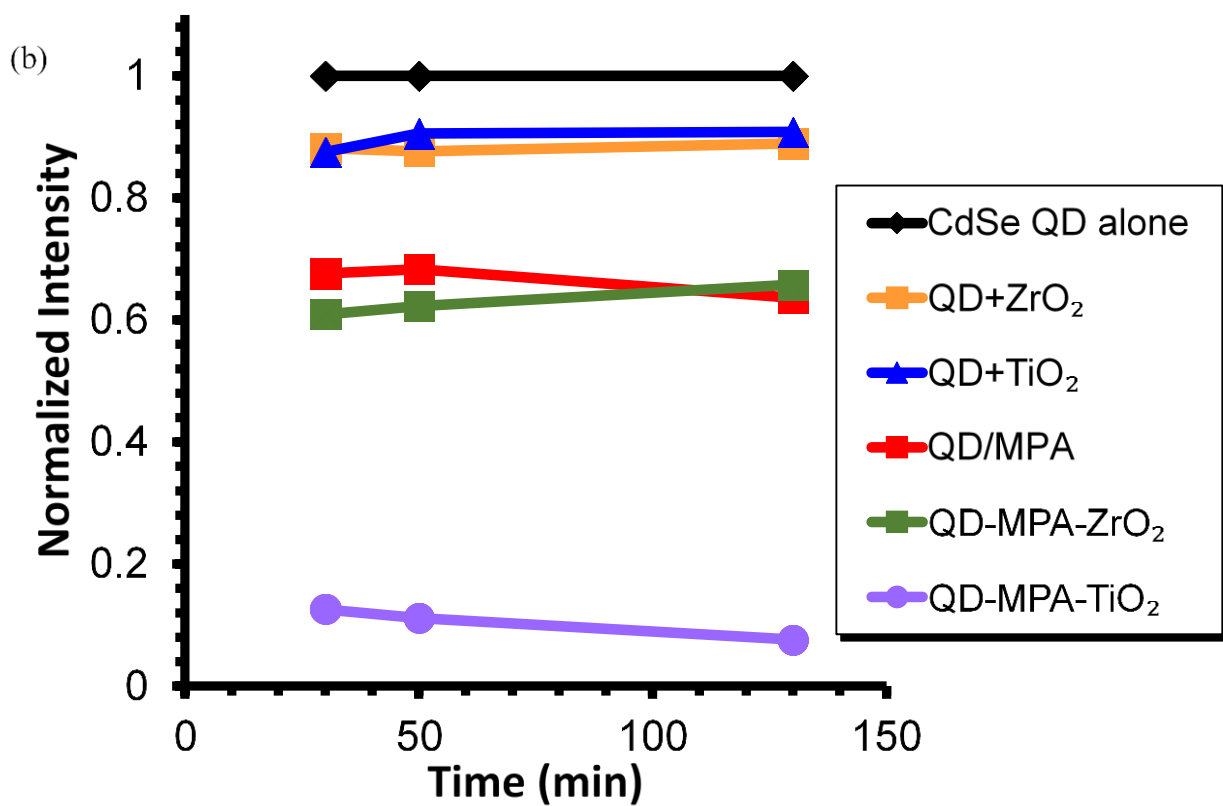

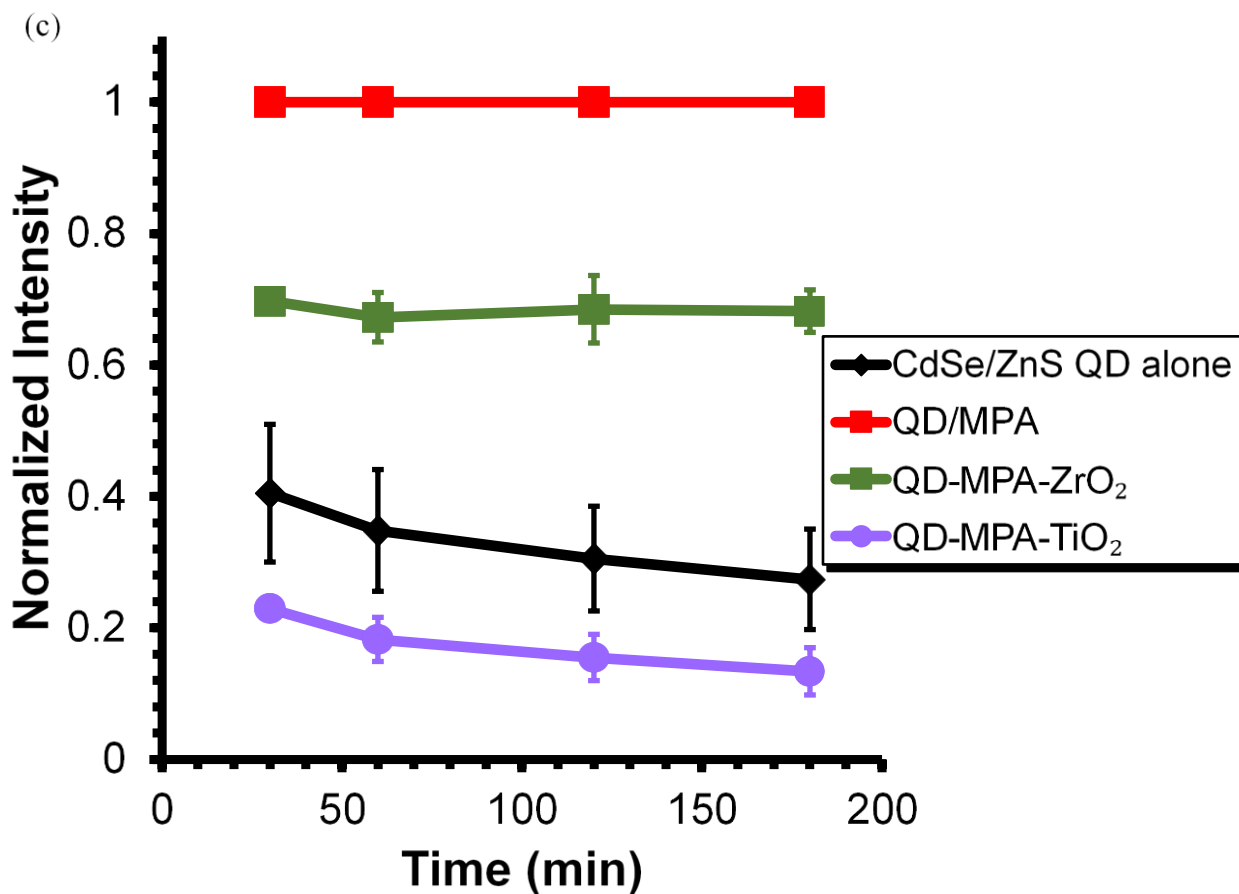

**Fig. S2.** Normalized emission intensity as a function of equilibration time for dispersions containing core-only CdSe QDs measured at the band-edge maximum of 515 nm (a) and the surface maximum of 750 nm (b) and for dispersions containing core/shell CdSe/ZnS QDs measured at the band-edge maximum of 540 nm (c). Graphs *a* and *b* contain representative data from one of three replicate measurements on such samples. Graph *c* contains averaged values from three measurements; error bars correspond to plus-or-minus one standard deviation relative to the average.

**Fig. S3.** Top graphs: TRPL decay traces (blue), IRF (red), and multiexponential reconvolution fits from eq. 1 (black) from representative measurements for each type of QD-containing dispersion at various wavelengths. Bottom graphs: corresponding residuals (data minus fit). Each set of graphs shows fits to monoexponential (left), biexponential (middle), and triexponential (right) functions. Corresponding chi-square values are in the insets.

**Core-only CdSe QDs alone ( $\lambda_{em} = 515$  nm):**

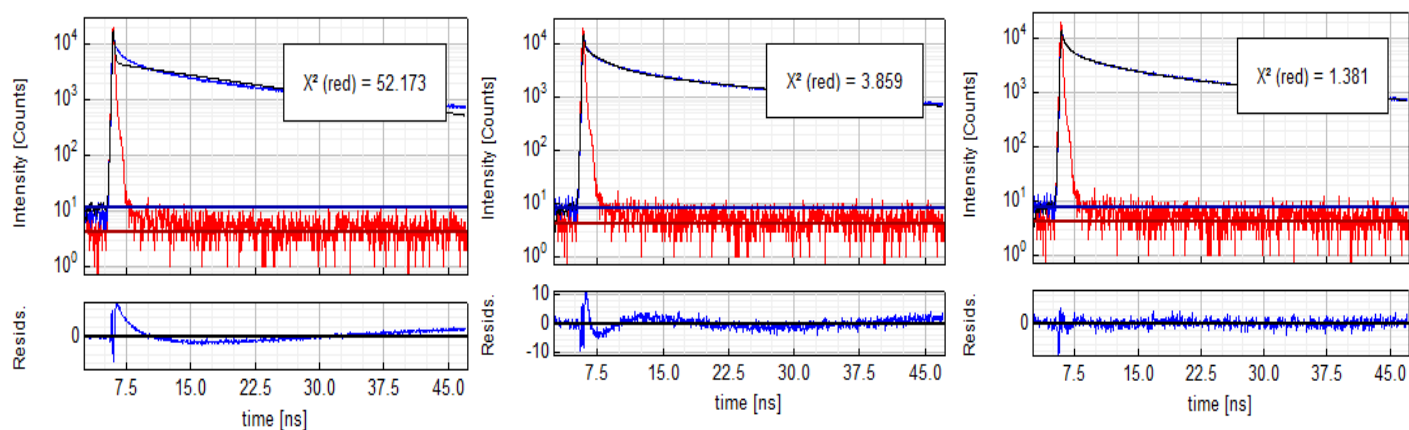

**Core-only CdSe QD/MPA ( $\lambda_{em} = 515$  nm):**

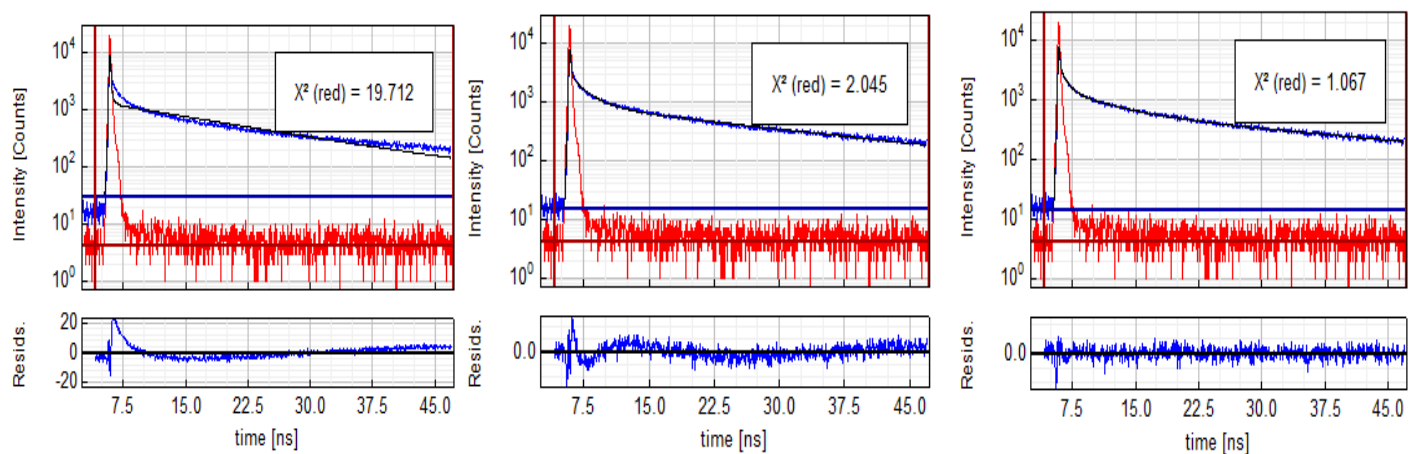

**Core-only CdSe QD-MPA-ZrO<sub>2</sub> ( $\lambda_{em} = 515$  nm):**

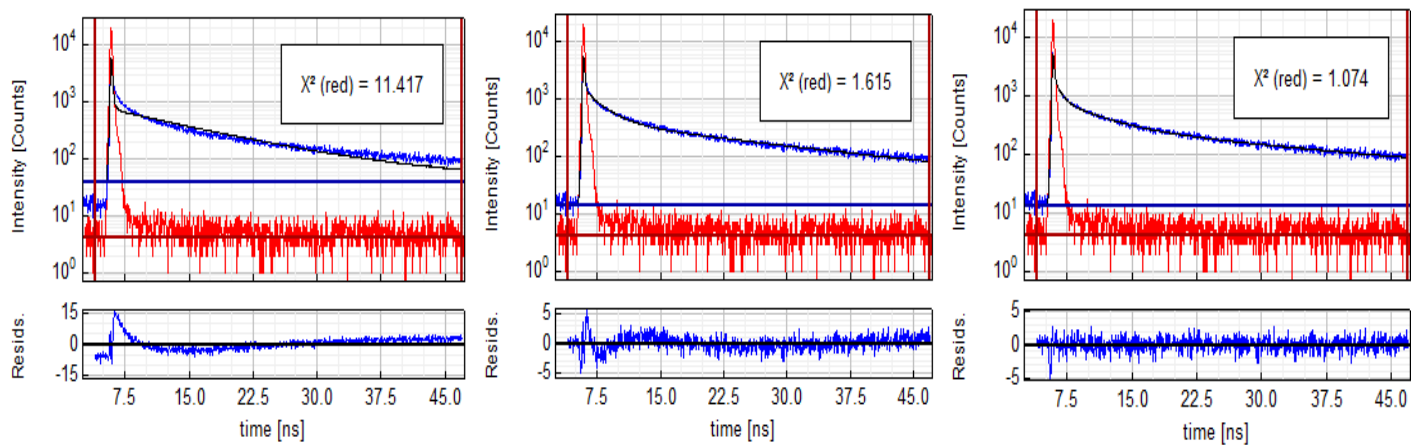

**Core-only CdSe QD-MPA-TiO<sub>2</sub> ( $\lambda_{em} = 515$  nm):**

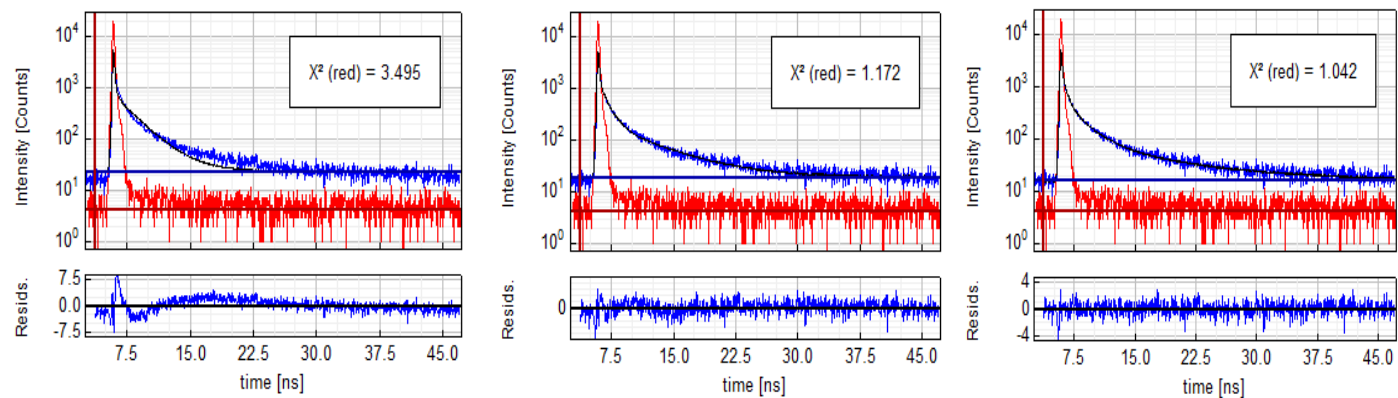

**Core-only CdSe QDs alone ( $\lambda_{em} = 622$  nm):**

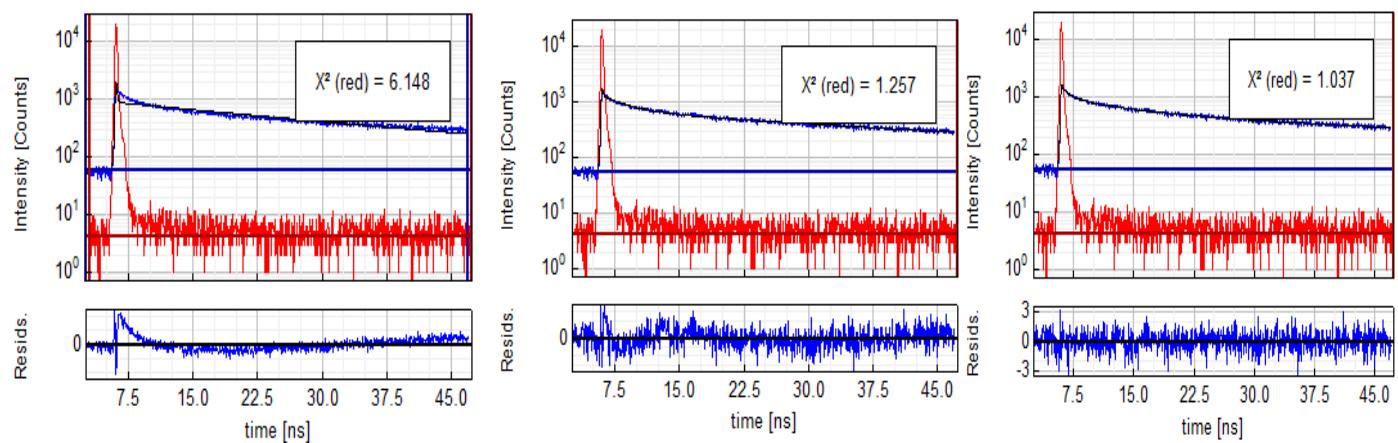



**Core-only CdSe QD/MPA ( $\lambda_{em} = 622$  nm):**

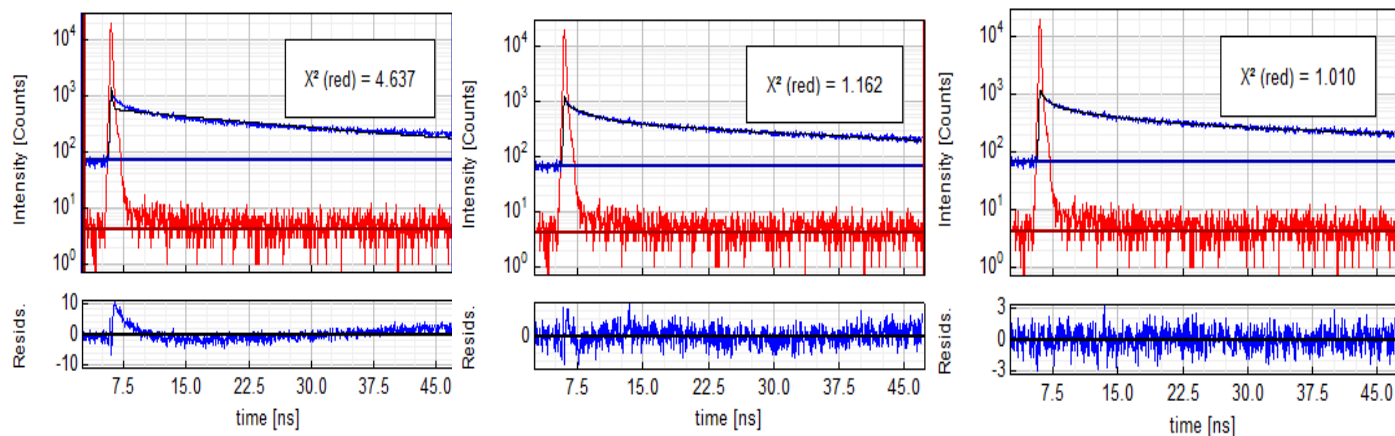

**Core only CdSe QD-MPA-ZrO<sub>2</sub> ( $\lambda_{em} = 622$  nm):**

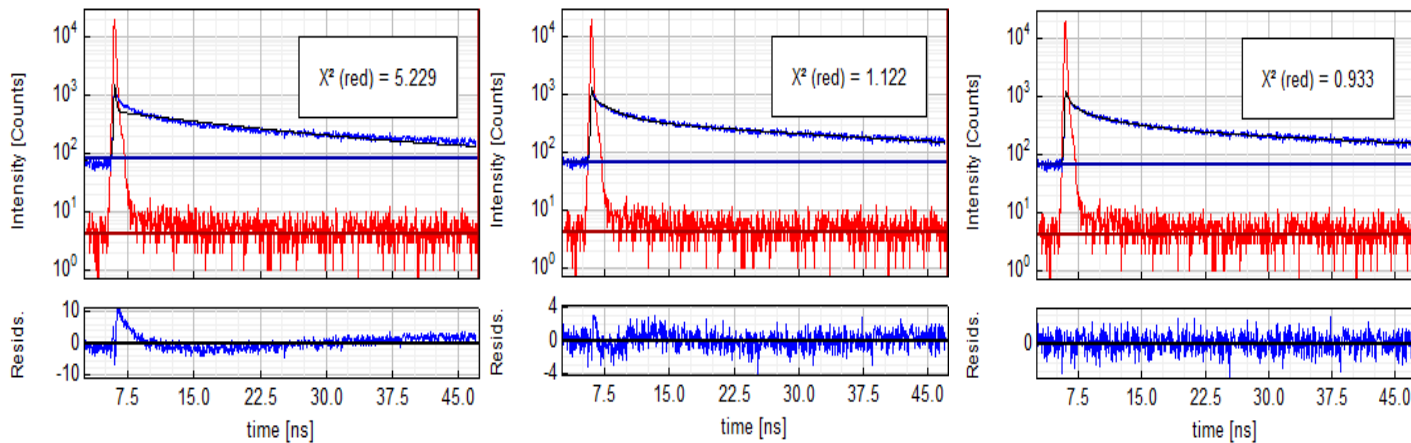

**Core-only CdSe QD-MPA-TiO<sub>2</sub> ( $\lambda_{em} = 622$  nm):**

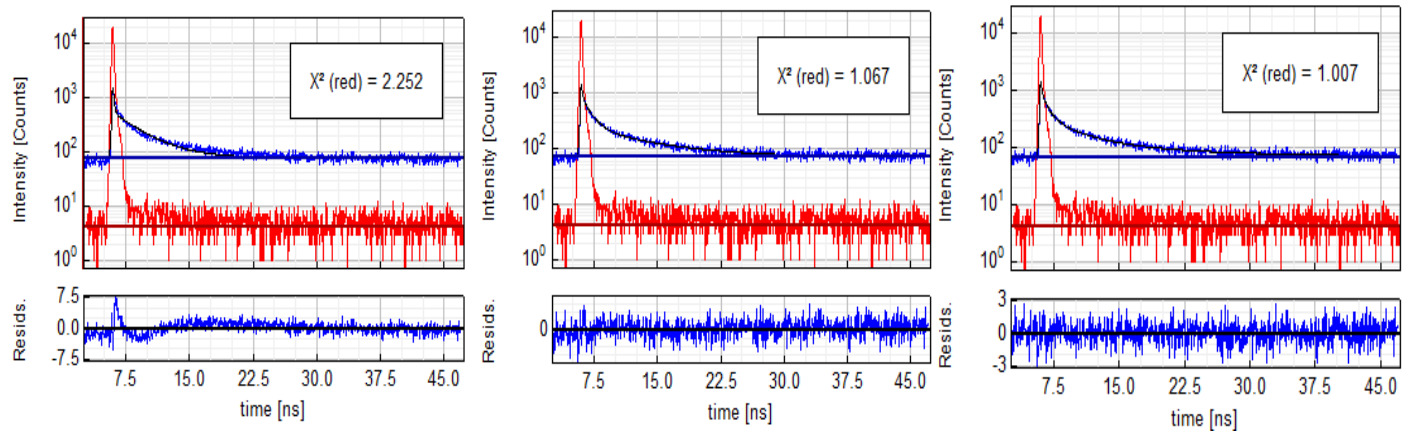

**Core/shell CdSe/ZnS QDs alone ( $\lambda_{em} = 540$  nm):**

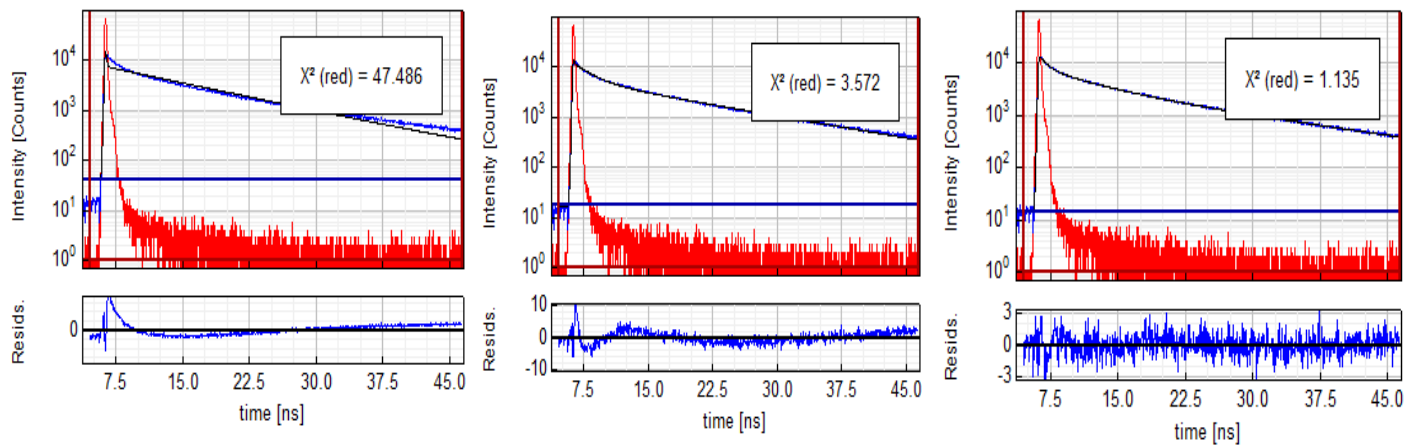

**Core/shell CdSe/ZnS QD/MPA ( $\lambda_{em} = 540$  nm):**

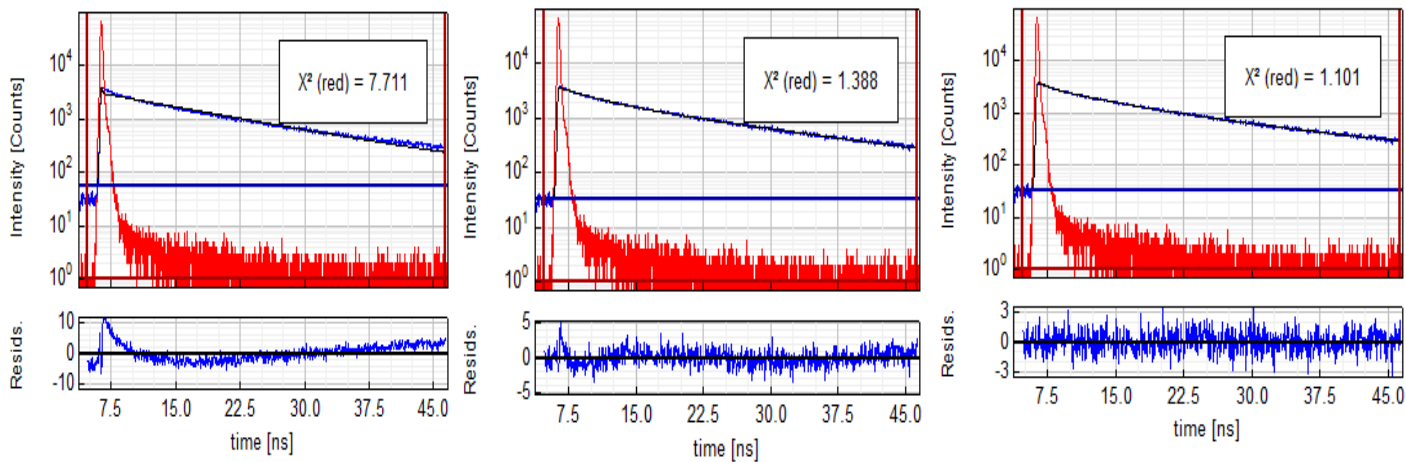

**Core/shell CdSe/ZnS QD-MPA-ZrO<sub>2</sub> ( $\lambda_{em} = 540$  nm):**

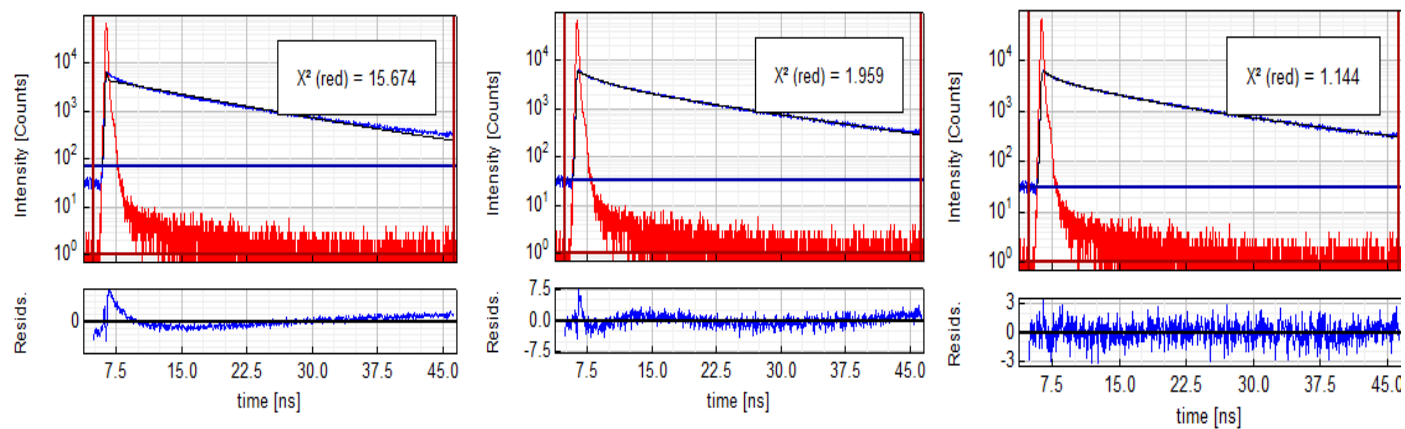

**Core/shell CdSe/ZnS QD-MPA-TiO<sub>2</sub> ( $\lambda_{em} = 540$  nm):**

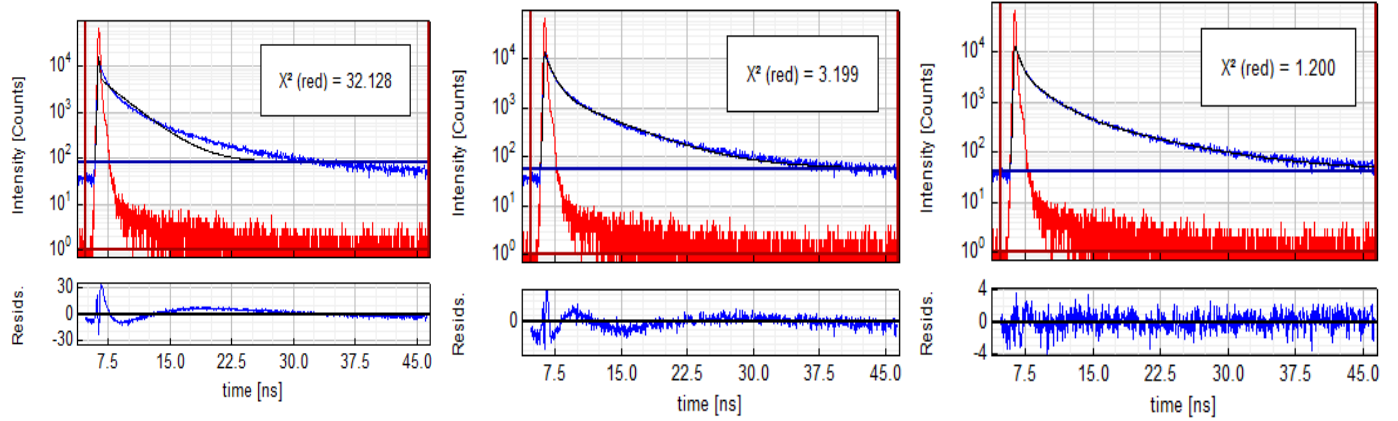

**Table S3.** Values of  $A_i$  and  $\tau_i$  from fits to representative emission decay traces within the band-edge (BE) and surface (S) emission bands for dispersions containing core-only CdSe QDs.

| Sample                  | Emission wavelength ( $\lambda_{em}$ ) (nm) | $A_1$ (norm.) | $\tau_1$ (ns) | $A_2$ (norm.) | $\tau_2$ (ns) | $A_3$ (norm.) | $\tau_3$ (ns) |
|-------------------------|---------------------------------------------|---------------|---------------|---------------|---------------|---------------|---------------|
| QDs alone               | 513 (BE)                                    | 0.48±0.02     | 0.70±0.03     | 0.290±0.005   | 5.0±0.1       | 0.229±0.001   | 32.0±0.3      |
|                         | 672 (S)                                     | 0.30±0.05     | 0.9±0.2       | 0.30±0.01     | 7.0±0.4       | 0.398±0.004   | 58±2          |
| QD/MPA                  | 513 (BE)                                    | 0.57±0.03     | 0.82±0.04     | 0.251±0.007   | 5.5±0.2       | 0.177±0.002   | 33.8±0.5      |
|                         | 672 (S)                                     | 0.35±0.06     | 0.8±0.1       | 0.31±0.01     | 6.8±0.4       | 0.336±0.005   | 57±0.2        |
| QD-MPA-ZrO <sub>2</sub> | 513 (BE)                                    | 0.55±0.04     | 0.80±0.06     | 0.31±0.01     | 4.7±0.2       | 0.147±0.002   | 30.1±0.7      |
|                         | 672 (S)                                     | 0.42±0.05     | 0.9±0.1       | 0.31±0.02     | 6.3±0.3       | 0.269±0.004   | 51±2          |
| QD-MPA-TiO <sub>2</sub> | 513 (BE)                                    | 0.70±0.05     | 0.60±0.04     | 0.26±0.01     | 2.6±0.1       | 0.043±0.003   | 11.5±0.6      |
|                         | 672 (S)                                     | 0.59±0.06     | 0.60±0.07     | 0.33±0.02     | 3.3±0.2       | 0.082±0.005   | 19±2          |

**Table S4.** Values of  $\langle\tau\rangle$  within the band-edge emission band and corresponding values of  $k_{et}$  and  $\eta_{et}$  for dispersions containing core-only CdSe QDs.

| Emission wavelength ( $\lambda_{em}$ ) (nm) | $\langle\tau\rangle_{QD \text{ alone}}$ (ns) | $\langle\tau\rangle_{QD/MPA}$ (ns) | $\langle\tau\rangle_{QD-MPA-ZrO_2}$ (ns) | $\langle\tau\rangle_{QD-MPA-TiO_2}$ (ns) | $k_{et}/10^8$ (s <sup>-1</sup> ) | $\eta_{et}$ (%) |
|---------------------------------------------|----------------------------------------------|------------------------------------|------------------------------------------|------------------------------------------|----------------------------------|-----------------|
| 487                                         | 27±1                                         | 25±2                               | 18±3                                     | 3.2±0.9                                  | 2.5±0.8                          | 82±6            |
| 500                                         | 27.1±0.6                                     | 26±1                               | 21±1                                     | 4.0±0.6                                  | 2.0±0.4                          | 81±3            |
| 513                                         | 26.5±0.4                                     | 26.8±0.8                           | 22.2±0.9                                 | 4.7±0.4                                  | 1.7±0.2                          | 79±2            |
| 525                                         | 28.4±0.6                                     | 26±1                               | 22±1                                     | 6.0±0.9                                  | 1.2±0.3                          | 73±4            |
| 538                                         | 29.5±0.9                                     | 31±2                               | 24±2                                     | 7±1                                      | 1.1±0.3                          | 71±5            |

**Table S5.** Values of  $\langle \tau \rangle$  within the surface emission band and corresponding values of  $k_{et}$  and  $\eta_{et}$  for dispersions containing core-only CdSe QDs.

| Emission wavelength ( $\lambda_{em}$ ) (nm) | $\langle \tau \rangle_{QD}$ alone (ns) | $\langle \tau \rangle_{QD+MPA}$ (ns) | $\langle \tau \rangle_{QD-MPA-ZrO_2}$ (ns) | $\langle \tau \rangle_{QD-MPA-TiO_2}$ (ns) | $k_{et}/10^7$ (s <sup>-1</sup> ) | $\eta_{et}$ (%) |
|---------------------------------------------|----------------------------------------|--------------------------------------|--------------------------------------------|--------------------------------------------|----------------------------------|-----------------|
| 610                                         | 43±1                                   | 39±2                                 | 42±3                                       | 15±3                                       | 4±2                              | 64±8            |
| 622                                         | 48±2                                   | 45±3                                 | 34±2                                       | 10±2                                       | 7±2                              | 71±6            |
| 635                                         | 45±2                                   | 44±2                                 | 37±2                                       | 13±3                                       | 5±2                              | 65±8            |
| 647                                         | 45±2                                   | 42±2                                 | 41±2                                       | 14±2                                       | 5±1                              | 66±5            |
| 660                                         | 48±2                                   | 47±2                                 | 45±3                                       | 11±2                                       | 7±1                              | 76±5            |
| 672                                         | 53±2                                   | 52±3                                 | 46±3                                       | 11±1                                       | 7±1                              | 76±3            |
| 685                                         | 57±2                                   | 47±3                                 | 45±3                                       | 11±1                                       | 7±1                              | 76±3            |
| 697                                         | 61±4                                   | 56±4                                 | 41±3                                       | 11±1                                       | 7±1                              | 73±3            |
| 710                                         | 56±3                                   | 55±4                                 | 49±4                                       | 13±2                                       | 6±1                              | 74±5            |
| 722                                         | 50±3                                   | 44±3                                 | 46±4                                       | 12±2                                       | 6±2                              | 74±5            |

**Table S6.** Values of  $\langle \tau \rangle$  within the band-edge emission band and corresponding values of  $k_{et}$  and  $\eta_{et}$  for dispersions containing core/shell CdSe/ZnS QDs.

| Emission wavelength ( $\lambda_{em}$ ) (nm) | $\langle \tau \rangle_{QD}$ alone (ns) | $\langle \tau \rangle_{QD+MPA}$ (ns) | $\langle \tau \rangle_{QD-MPA-ZrO_2}$ (ns) | $\langle \tau \rangle_{QD-MPA-TiO_2}$ (ns) | $k_{et}/10^8$ (s <sup>-1</sup> ) | $\eta_{et}$ (%) |
|---------------------------------------------|----------------------------------------|--------------------------------------|--------------------------------------------|--------------------------------------------|----------------------------------|-----------------|
| 500                                         | 13.7±0.4                               | 22±1                                 | 16.8±0.8                                   | 2.5±0.2*                                   | 3.3±0.4                          | 85±2            |
| 513                                         | 13.8±0.2                               | 18.3±0.5                             | 14.9±0.3                                   | 3.1±0.2                                    | 2.6±0.2                          | 80±1            |
| 525                                         | 13.3±0.2                               | 18.0±0.4                             | 14.4±0.6                                   | 3.5±0.1                                    | 2.2±0.1                          | 76±1            |
| 537                                         | 13.3±0.1                               | 18.0±0.3                             | 15.1±0.2                                   | 4.2±0.1                                    | 1.7±0.1                          | 72±1            |
| 550                                         | 14.0±0.2                               | 18.4±0.4                             | 15.5±0.3                                   | 4.8±0.1                                    | 1.4±0.1                          | 69±1            |
| 563                                         | 15.0±0.3                               | 21.0±0.6                             | 16.8±0.4                                   | 5.7±0.2                                    | 1.2±0.1                          | 66±2            |
| 575                                         | 16.7±0.6                               | 22±1*                                | 18±0.7*                                    | 6.3±0.5                                    | 1.1±0.1                          | 66±3            |

\* biexponential fits.

**Table S7.** Values of  $A_i$  and  $\tau_i$  from fits to representative emission decay traces within the band-edge (BE) emission band for dispersions containing core/shell CdSe/ZnS QDs.

| Sample                  | Emission wavelength ( $\lambda_{em}$ ) (nm) | $A_1$ (norm.) | $\tau_1$ (ns) | $A_2$ (norm.) | $\tau_2$ (ns) | $A_3$ (norm.) | $\tau_3$ (ns) |
|-------------------------|---------------------------------------------|---------------|---------------|---------------|---------------|---------------|---------------|
| QDs alone               | 513 (BE)                                    | 0.38±0.02     | 0.80±0.04     | 0.329±0.003   | 5.23±0.07     | 0.286±0.002   | 16.9±0.1      |
| QD/MPA                  | 513 (BE)                                    | 0.24±0.02     | 1.1±0.1       | 0.469±0.006   | 8.6±0.1       | 0.295±0.003   | 23.9±0.3      |
| QD-MPA-ZrO <sub>2</sub> | 513 (BE)                                    | 0.27±0.02     | 0.80±0.08     | 0.350±0.006   | 5.6±0.1       | 0.381±0.002   | 17.4±0.1      |
| QD-MPA-TiO <sub>2</sub> | 513 (BE)                                    | 0.71±0.02     | 0.40±0.01     | 0.237±0.005   | 2.0±0.1       | 0.051±0.001   | 7.7±0.1       |
